# Supplementary material for: An alternative synthesis method for [Os(NN)(CO)2X2] complexes (NN = 2,2′-bipyridine, 4,4′-dimethyl-2,2′-bipyridine; X = Cl, Br, I). Electrochemical and photochemical properties and behavior
Source: Royal Society of Chemistry journal article supplement (doi:10.1039/b704931e), 2007-01-01
Supplement: b704931e.pdf [file b704931e.pdf]

## Supporting Information for:

### An Alternative Synthesis Method for [Os(NN)(CO)<sub>2</sub>X<sub>2</sub>] Complexes (X = Cl, Br, I, and NN = 2,2'-bipyridine, 4,4'-dimethyl-2,2'-bipyridine). Electrochemical and Photochemical Properties and Behavior.

Minna Jakonen<sup>a</sup>, Pipsa Hirva<sup>a</sup>, Matti Haukka<sup>a\*</sup>, Sylvie Chardon-Noblat<sup>b\*</sup>,  
Frédéric Lafalet<sup>b</sup>, Jérôme Chauvin<sup>b</sup>, Alain Deronzier<sup>b</sup>

- a* Department of Chemistry, University of Joensuu, Department of Chemistry, P.O. Box 111, FIN-80101, Joensuu, Finland, FAX +358-13-251 3390, E-mail: [matti.haukka@joensuu.fi](mailto:matti.haukka@joensuu.fi)
- b* Chimie Inorganique Rédox: Biomimétismes et Nanostructures, Département de Chimie Moléculaire UMR-5250 - ICMG FR-2607, CNRS - Université Joseph Fourier, BP-53, 38041 GRENOBLE, Cedex 9, France, FAX +33 (0)4 76 51 42 67, E-Mail: [sylvie.chardon@ujf-grenoble.fr](mailto:sylvie.chardon@ujf-grenoble.fr)

**Figures S1-S3:** Thermal ellipsoid plots (at 50 % probability level) of structures **1**, **1B**, and **4**.

**Figure S4:** The EDS-spectrum of Os-rich side product formed in the first step of the synthesis.

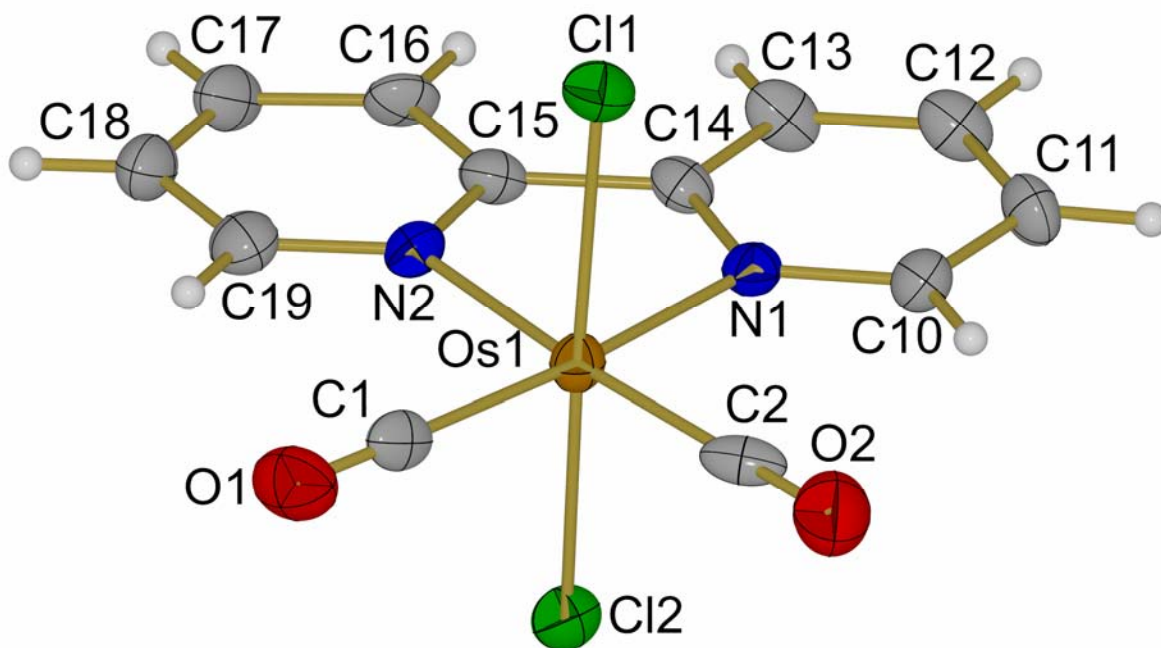

**FIGURE S1:** Thermal ellipsoid plots (at 50 % probability level) of *trans*-(Cl)-[OsCl<sub>2</sub>(bpy)(CO)<sub>2</sub>] (**1**) (in space group Pn).

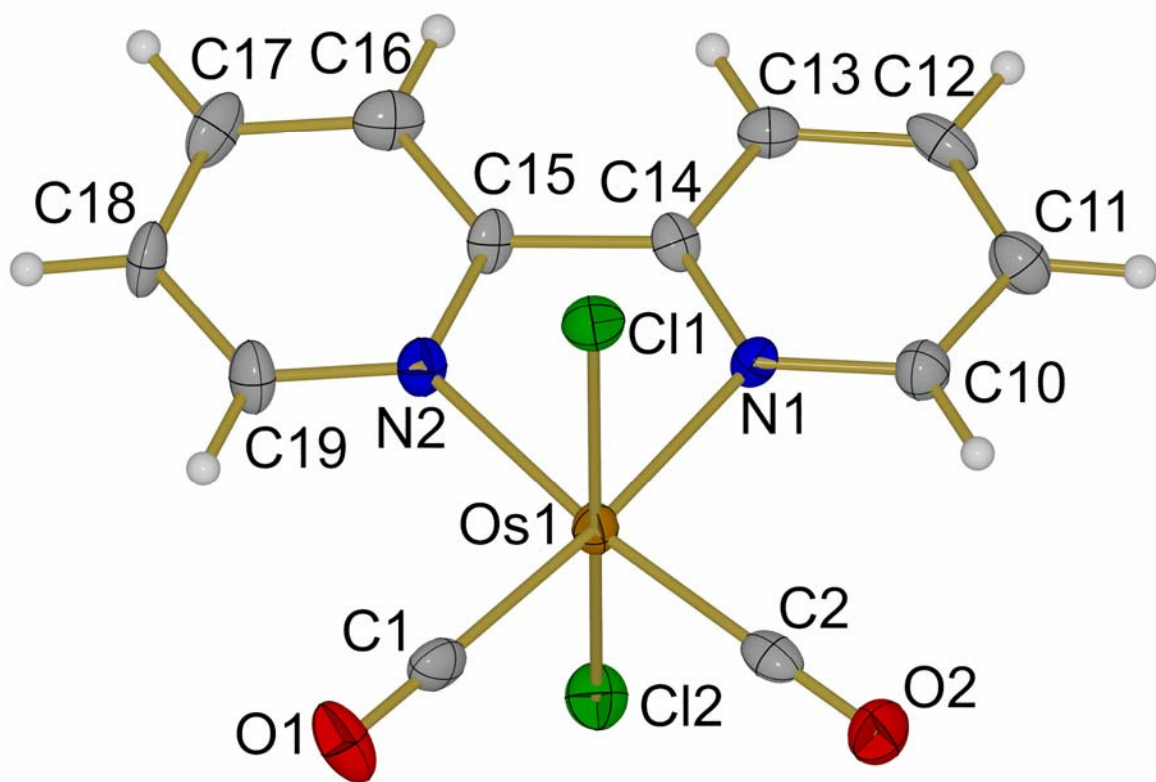

**FIGURE S2:** Thermal ellipsoid plots (at 50 % probability level) of *trans*-(Cl)-[OsCl<sub>2</sub>(bpy)(CO)<sub>2</sub>] (**1B**) (in space group P2<sub>1</sub>/n).

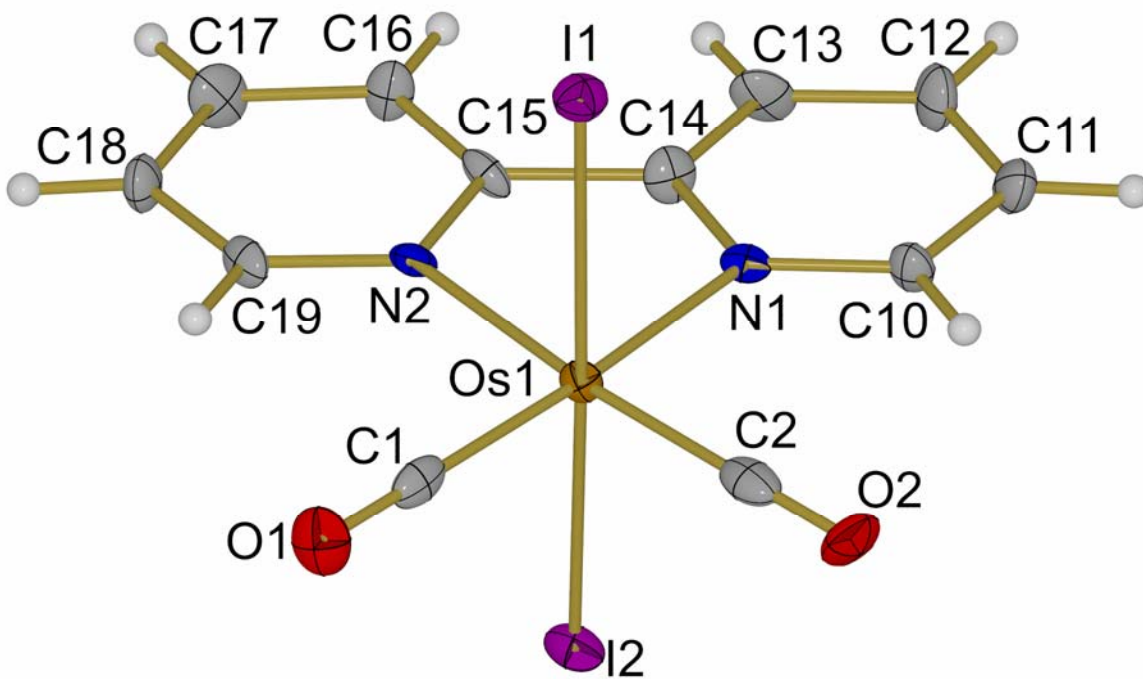

**FIGURE S3:** Thermal ellipsoid plots (at 50 % probability level) of *trans*-(Cl)-[OsI<sub>2</sub>(bpy)(CO)<sub>2</sub>] (**4**).

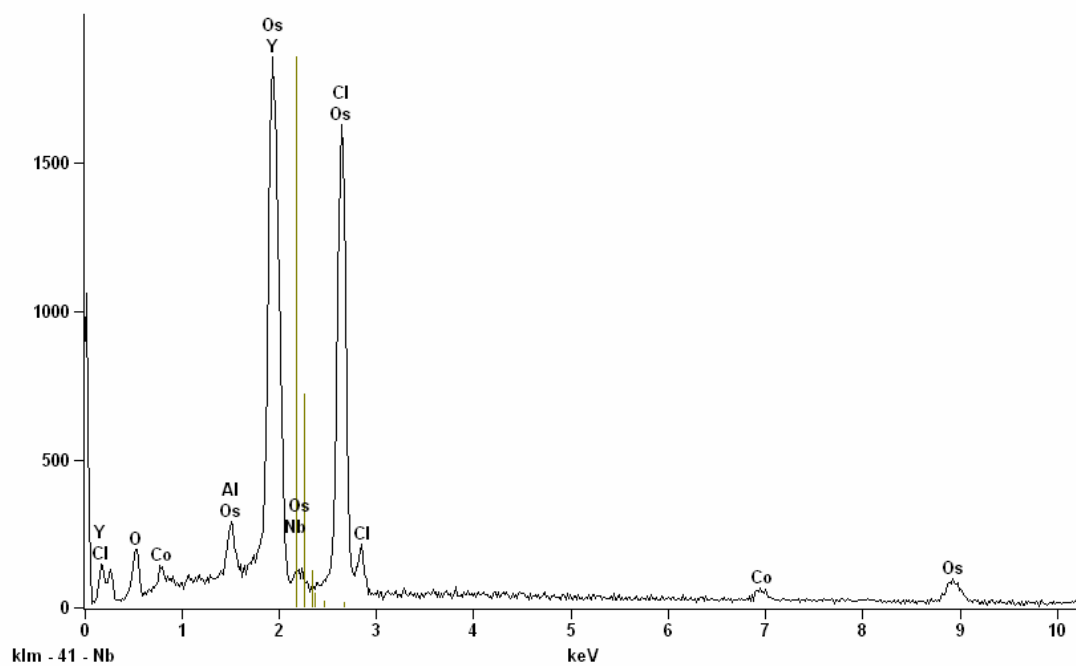

**FIGURE S4:** The EDS-spectrum of Os-rich side product formed in the first step of the synthesis.
